# Supplementary material for: CALDERA: a scientific drilling concept to unravel Connections Among Life, geo-Dynamics and Eruptions in a Rifting Arc caldera, Okataina Volcanic Centre, Aotearoa New Zealand
Source: Copernicus journal article supplement (doi:10.5194/sd-33-67-2024), 2024-04-02
Supplement: Supplementary file 1 [file sd-33-67-2024-supplement.pdf]

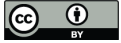

*Supplement of*

**CALDERA: a scientific drilling concept to unravel Connections Among Life, geo-Dynamics and Eruptions in a Rifting Arc caldera, Okataina Volcanic Centre, Aotearoa New Zealand**

Cécile Massiot et al.

*Correspondence to:* Cécile Massiot (c.massiot@gns.cri.nz)

The copyright of individual parts of the supplement might differ from the article licence.

| <b>Technique</b>                                                        | <b>Main findings</b>                                                                                                                                                                                                                                                                                                                          | <b>Reference</b>                                                                               |
|-------------------------------------------------------------------------|-----------------------------------------------------------------------------------------------------------------------------------------------------------------------------------------------------------------------------------------------------------------------------------------------------------------------------------------------|------------------------------------------------------------------------------------------------|
| Mapping, dating                                                         | ~625 ka of effusive and explosive activity but history prior to ca. 340 ka is poorly defined due to scarce exposure. Up to four caldera-forming ignimbrite eruptions have occurred: two definite collapses (ca. 322 ka Matahina and ca. 45-61 ka Rotoiti/Rotoehu) and two possible collapses (ca. 557 ka Utu and ca. 33 ka Mangaone/Kawerau). | Manning (1996), Nairn (2002), Leonard and Begg (2010), Cole et al. (2010, 2014)                |
| 3-D geological model                                                    | 3-D geological model of the basement top surface based on the geology map, active fault map and gravity inversion.                                                                                                                                                                                                                            | Carson et al. (2022)                                                                           |
| Whole-rock chemistry: major, trace $\pm$ isotopes                       | Compositions and mineralogies of the Rotoiti and post-Rotoiti magmas are well-characterised. Older eruptions characterised in varying detail.                                                                                                                                                                                                 | Schmitz and Smith (2004), Smith et al. (2005, 2006), Deering et al. (2011), Rowe et al. (2021) |
| Estimates of magma storage conditions                                   | Pressure, temperature and oxygen fugacity estimates available for the Rotoiti and all subsequent rhyolitic eruptions (and some basaltic), plus some older units.                                                                                                                                                                              | Hughes et al. (2023), Smith et al. (2005), Deering et al. (2008)                               |
| Rock samples with various parameters measured                           | Over 620 rock samples in the PETLAB public database.                                                                                                                                                                                                                                                                                          | GNS Science (2004)                                                                             |
| LiDAR, active fault mapping                                             | Numerous faults outside the OVC, but no fault nor graben structures that could be associated with shallow arrested dikes intra-caldera.                                                                                                                                                                                                       | GNS Science (2004), Villamor et al. (2011)                                                     |
| Paleoseismology                                                         | World-class (48 paleoseismic trenches), with clear examples of volcano-tectonic interactions and of ruptures that do not coincide with eruptions.                                                                                                                                                                                             | Villamor et al. (2011, 2022), Berryman et al. (2022)                                           |
| Multi-geophysical inversions                                            | Main intra-caldera magma location defined from MT aligns with subsidence of 10-15 mm/year by InSAR, the -60 mGal gravity low and numerous earthquake hypocenters.                                                                                                                                                                             | Bannister et al. (2022), Bertrand et al. (2022), Hamling et al. (2022), Miller et al. (2022)   |
| Gravity (terrestrial and lake) data at ~500 m spacing                   | Delineate the overlapping and nested structural boundaries of collapse events.                                                                                                                                                                                                                                                                | Miller et al. (2022)                                                                           |
| Aeromagnetic data                                                       | Delineate solidified magma feeder structures beneath the caldera, infilling lava domes and small areas of hydrothermal alteration.                                                                                                                                                                                                            | Miller et al. (2022)                                                                           |
| 3D magnetotelluric inversions to 20 km depth from ~2 km station spacing | Image the main upwelling of magma and hydrothermal fluids under Makatiti dome, and secondary upwellings towards the caldera margins.                                                                                                                                                                                                          | Bertrand et al. (2022)                                                                         |

|                                                           |                                                                                                                                                                                                                                      |                                                                                                         |
|-----------------------------------------------------------|--------------------------------------------------------------------------------------------------------------------------------------------------------------------------------------------------------------------------------------|---------------------------------------------------------------------------------------------------------|
| InSAR, Geodetic data                                      | InSAR images for the last 20 years and GNSS geodetic stations show subsidence across the OVC and surrounding areas of up to ~15 mm/yr.                                                                                               | Hamling et al. (2022)                                                                                   |
| Seismicity                                                | Illuminates active faults and inferred deep dike intrusion. Seismic anisotropy shows complex stress directions near the caldera, contrary to rift-aligned directions in-between calderas.                                            | Bannister et al. (2016, 2022), Illsley-Kemp et al. (2019), Benson et al. (2021)                         |
| Fluid geochemistry                                        | Fumarole, spring, and shallow groundwater chemistry.                                                                                                                                                                                 | Databases: Geonet, GGW. Stucker et al. (2016, 2023), White and Leonard (2023)                           |
| CO <sub>2</sub> flux surveys                              | Multiple soil and lake CO <sub>2</sub> flux surveys across the caldera show that magmatic gases reach the surface along highly heterogeneous pathways.                                                                               | Mazot et al. (2014), Hughes et al. (2019), Yang et al. (2023)                                           |
| Groundwater                                               | Hydraulic conductivity, groundwater quality and age were measured in three <100 m-deep groundwater wells to support a groundwater flow model of the Tarawera Lake catchment assessing land use and nitrogen discharge.               | Bruere and White (2016), White and Leonard (2023)                                                       |
| Geothermal exploration well                               | The RM1 well drilled to 1498 m (in 1995, no longer accessible) suggested vertical and lateral flows of both hydrothermal fluids and groundwater.                                                                                     | Bromley and Nairn (1995)                                                                                |
| Natural hazard monitoring by GeoNet                       | Near-real-time, publicly available data from 13 GNSS stations and short-period seismometers, two strong-motion sensors, two springs for water temperature and level, and annual fluid chemistry from eight springs and one fumarole. | Geonet                                                                                                  |
| Multi-disciplinary surveys of the lakes                   | Bathymetry, gravity, magnetics, heatflow, water column measurements.                                                                                                                                                                 | Caratori Tontini et al. (2016, 2023), de Ronde et al. (2016), Tivey et al. (2016), Walker et al. (2016) |
| Biosphere: physical, chemical, and microbial biodiversity | Diverse microbiota have been identified through extensive sampling of hot springs in the TVZ. The genus <i>Venenivibrio</i> (phylum Aquificota) appears to be endemic to Aotearoa-New Zealand.                                       | Sharp et al. (2014), Ward et al. (2017), Power et al. (2018, 2024), Sriaporn et al. (2021)              |

**Supplementary material Table 1: Summary of datasets collected in the OVC region and their main findings.**

## References

- 5 Bannister, S., Sherburn, S., and Bourguignon, S.: Earthquake swarm activity highlights crustal faulting associated with the Waimangu–Rotomahana–Mt Tarawera geothermal field, Taupo Volcanic Zone, *Journal of Volcanology and Geothermal Research*, 314, 49-56, <https://doi.org/10.1016/j.jvolgeores.2015.07.024>, 2016.
- Bannister, S., Bertrand, E. A., Heimann, S., Bourguignon, S., Asher, C., Shanks, J., and Harvison, A.: Imaging sub-caldera structure with local seismicity, Okataina Volcanic Centre, Taupo Volcanic Zone, using double-difference seismic  
10 tomography, *Journal of Volcanology and Geothermal Research*, 431, 107653, <https://doi.org/10.1016/j.jvolgeores.2022.107653>, 2022.
- Benson, T. W., Illsley-Kemp, F., Elms, H. C., Hamling, I. J., Savage, M. K., Wilson, C. J., Mestel, E. R., and Barker, S. J.: Earthquake analysis suggests dyke intrusion in 2019 near Tarawera volcano, New Zealand, *Frontiers in Earth Science*, 8,606992, <https://doi.org/10.3389/feart.2020.606992>, 2021.
- 15 Berryman, K., Villamor, P., Nairn, I., Begg, J., Alloway, B. V., Rowland, J., Lee, J., and Capote, R.: Volcano-tectonic interactions at the southern margin of the Okataina Volcanic Centre, Taupō Volcanic Zone, New Zealand. *Journal of Volcanology and Geothermal Research*, 427, 107552, <https://doi.org/10.1016/j.jvolgeores.2022.107552>, 2022.
- Bertrand, E. A., Kannberg, P., Caldwell, T. G., Heise, W., Constable, S., Scott, B., Bannister, S., Kilgour, G., Bennie, S. L., Hart, R., and Palmer, N.: Inferring the magmatic roots of volcano-geothermal systems in the Rotorua Caldera and Okataina  
20 Volcanic Centre from magnetotelluric models, *Journal of Volcanology and Geothermal Research*, 431, 107645, <https://doi.org/10.1016/j.jvolgeores.2022.107645>, 2022.
- Bromley, C. J. and Nairn, I. A.: Rotoma: review of drilling results - RM1. Institute of Geological & Nuclear Sciences client report 72436C.10Y. 9 p. Confidential report made available to the CALDERA project strictly for planning purposes, 1995.
- Bruere, A. and White, P.: Groundwater in the Greater Lake Tarawera Catchment: Notes and Summary of GNS Science Reports,  
25 <http://www.rotorualakes.co.nz/vdb/document/1463>, 2016.
- Caratori Tontini, F., de Ronde, C. E. J., Scott, B. J., Soengkono, S., Stagpoole, V., Timm, C., and Tivey, M.: Interpretation of gravity and magnetic anomalies at Lake Rotomahana: Geological and hydrothermal implications, *Journal of Volcanology and Geothermal Research*, 314, 84-94, <https://doi.org/10.1016/j.jvolgeores.2015.07.002>, 2016.
- Caratori Tontini, F., de Ronde, C. E. J., Black, J., Stucker, V. K., and Walker, S. L.: The geology and geophysics of Lake  
30 Tarawera, New Zealand: Implications for sublacustrine geothermal activity, *Journal of Volcanology and Geothermal Research*, 433, 107731, <https://doi.org/10.1016/j.jvolgeores.2022.107731>, 2023.
- Carson et al. 3D visualisation model of the basement geology and caldera structure at Okataina Volcanic Centre. IN: Zernack, A.V.; Palmer, J. (eds.) *Geoscience Society of New Zealand Annual Conference, 29th November - 1st December 2022*, Massey University, Palmerston North: programme and abstracts. Wellington, NZ: Geoscience Society of New Zealand.  
35 Geoscience Society of New Zealand miscellaneous publication 161A.
- Cole, J. W., Deering, C. D., Burt, R. M., Sewell, S., Shane, P. A. R., and Matthews, N. E.: Okataina Volcanic Centre, Taupo

- Volcanic Zone, New Zealand: A review of volcanism and synchronous pluton development in an active, dominantly silicic caldera system, *Earth-Science Reviews*, 128, 1-17, <https://doi.org/10.1016/j.earscirev.2013.10.008>, 2014.
- 40 Cole, J. W., Spinks, K. D., Deering, C. D., Nairn, I. A., and Leonard, G. S.: Volcanic and structural evolution of the Okataina Volcanic Centre; dominantly silicic volcanism associated with the Taupo Rift, New Zealand, *Journal of Volcanology and Geothermal Research*, 190(1-2), 123-135, <https://doi.org/10.1016/j.jvolgeores.2009.08.011>, 2010.
- de Ronde, C. E. J., Walker, S. L., LeBlanc, C., Davy, B. W., Fornari, D. J., Tontini, F. C., Scott, B. J., Seebeck, H., Stewart, T. J., Mazot, A., and Nicol, A.: Reconstruction of the geology and structure of Lake Rotomahana and its hydrothermal systems from high-resolution multibeam mapping and seismic surveys: Effects of the 1886 Tarawera Rift eruption, *Journal of Volcanology and Geothermal Research*, 314, 57-83, <https://doi.org/10.1016/j.jvolgeores.2016.02.002>, 2016.
- 45 Deering, C. D., Cole, J. W., and Vogel, T. A.: A rhyolite compositional continuum governed by lower crustal source conditions in the Taupo Volcanic Zone, New Zealand, *Journal of Petrology*, 49(12), 2245-2276, <https://doi.org/10.1093/petrology/egn067>, 2008.
- Deering, C. D., Cole, J. W., and Vogel, T. A.: Extraction of crystal-poor rhyolite from a hornblende-bearing intermediate 50 mush: a case study of the caldera-forming Matahina eruption, Okataina volcanic complex, *Contributions to Mineralogy and Petrology*, 161, 129-151, <https://doi.org/10.1007/s00410-010-0524-0>, 2011.
- Geonet. <https://www.geonet.org.nz/>
- Geothermal and GroundWater (GGW) Database. 2023 – Release 3.2.10. Lower Hutt (NZ): GNS Science. [updated 2021 Nov 11; accessed 2023 Sept 23]. <https://doi.org/10.21420/9QTA-4884>
- 55 GNS Science. Petlab: New Zealand's national rock, mineral and geoanalytical database. [Data set]. (2004) <https://doi.org/10.21420/9DJH-RP34>
- Hamling, I. J., Kilgour, G., Hreinsdottir, S., Bertrand, E., and Bannister, S.: Estimating the distribution of melt beneath the Okataina Caldera, New Zealand: an integrated approach using geodesy, seismology and magnetotellurics, *Journal of Volcanology and Geothermal Research*, 426, 107549, <https://doi.org/10.1016/j.jvolgeores.2022.107549>, 2022.
- 60 Hughes, E. C., Mazot, A., Kilgour, G., Asher, C., Michelini, M., Britten, K., Chardot, L., Feisel, Y., and Werner, C.: Understanding degassing pathways along the 1886 Tarawera (New Zealand) volcanic fissure by combining soil and lake CO<sub>2</sub> fluxes, *Frontiers in Earth Science*, 7, 264, <https://doi.org/10.3389/feart.2019.00264>, 2019.
- Hughes, E. C., Law, S., Kilgour, G., Blundy, J. D., and Mader, H. M.: Storage, evolution, and mixing in basaltic eruptions from around the Okataina Volcanic Centre, Taupō Volcanic Zone, Aotearoa New Zealand, *Journal of Volcanology and Geothermal Research*, 434, 107715, <https://doi.org/10.1016/j.jvolgeores.2022.107715>, 2023.
- 65 Illsley-Kemp, F., Savage, M. K., Wilson, C. J., and Bannister, S.: Mapping stress and structure from subducting slab to magmatic rift: Crustal seismic anisotropy of the North Island, New Zealand, *Geochemistry, Geophysics, Geosystems*, 20(11), 5038-5056, <https://doi.org/10.1029/2019GC008529>, 2019.
- Leonard, G. S. and Begg, J. G.: Geology of the Rotorua area 1:250,000 Geological Map 5. (Institute of Geological and Nuclear

- 70 Sciences, 2010).
- Manning, D. A.: Middle-late Pleistocene tephrostratigraphy of the eastern Bay of Plenty, New Zealand, *Quaternary International*, 34, 3-12, [https://doi.org/10.1016/1040-6182\(95\)00064-X](https://doi.org/10.1016/1040-6182(95)00064-X), 1996
- Mazot, A., Schwandner, F. M., Christenson, B., de Ronde, C. E., Inguaggiato, S., Scott, B., Graham, D., Britten, K., Keeman, J., and Tan, K.: CO<sub>2</sub> discharge from the bottom of volcanic Lake Rotomahana, New Zealand, *Geochemistry, Geophysics, Geosystems*, 15(3), 577-588, <https://doi.org/10.1002/2013GC004945>, 2014.
- 75 Miller, C. A., Barretto, J., Stagpoole, V., Caratori Tontini, F., Brakenrig, T., and Bertrand, E.: The integrated history of repeated caldera formation and infill at the Okataina Volcanic Centre: Insights from 3D gravity and magnetic models, *Journal of Volcanology and Geothermal Research*, 427, 107555, <https://doi.org/10.1016/j.jvolgeores.2022.107555>, 2022.
- Nairn, I. A.: *Geology of the Okataina Volcanic Centre, scale 1: 50 000*. Institute of Geological and Nuclear Sciences geological map 25. 1 sheet+ 156 p. Institute of Geological and Nuclear Sciences Ltd, 2002.
- 80 New Zealand Active Faults Database. 2003–. Lower Hutt (NZ): GNS Science. [updated 2020 Oct 20; accessed 2023 September 22]. [gns.cri.nz/Home/Products/Databases/Active-Faults-Database-of-New-Zealand](https://gns.cri.nz/Home/Products/Databases/Active-Faults-Database-of-New-Zealand)
- Power, J. F., Carere, C. R., Lee, C. K., Wakerley, G. L., Evans, D. W., Button, M., White, D., Climo, M. D., Hinze, A. M., Morgan, X. C., and McDonald, I. R.: Microbial biogeography of 925 geothermal springs in New Zealand, *Nature communications*, 9(1), 2876, <https://doi.org/10.1038/s41467-018-05020-y>, 2018.
- 85 Power, J.F., Carere, C.R., Welford, H.E., Hudson, D.T., Lee, K.C., Moreau, J.W., Ettema, T.J., Reysenbach, A.L., Lee, C.K., Colman, D.R. and Boyd, E.S.: A genus in the bacterial phylum Aquificota appears to be endemic to Aotearoa-New Zealand. *Nature Commun*, 15(1), p.179, <https://doi.org/10.1038/s41467-023-43960-2>, 2024.
- Rowe, M. C., Carey, R. J., White, J. D., Kilgour, G., Hughes, E., Ellis, B., Rosseel, J. B., and Segovia, A.: Tarawera 1886: an integrated review of volcanological and geochemical characteristics of a complex basaltic eruption, New Zealand, *Journal of Geology and Geophysics*, 64(2-3), 296-319, <https://doi.org/10.1080/00288306.2021.1914118>, 2021.
- Schmitz, M. D. and Smith, I.E.: The petrology of the Rotoiti eruption sequence, Taupo Volcanic Zone: an example of fractionation and mixing in a rhyolitic system, *Journal of Petrology*, 45(10), 2045-66, <https://doi.org/10.1093/petrology/egh047>, 2004.
- 95 Sharp, C. E., Brady, A. L., Sharp, G. H., Grasby, S. E., Stott, M. B., and Dunfield, P. F.: Humboldt's spa: microbial diversity is controlled by temperature in geothermal environments, *The ISME journal*, 8(6), 1166-1174, <https://doi.org/10.1038/ismej.2013.237>, 2014.
- Smith, V. C., Shane, P., and Nairn, I. A.: Trends in rhyolite geochemistry, mineralogy, and magma storage during the last 50 kyr at Okataina and Taupo volcanic centres, Taupo Volcanic Zone, New Zealand, *Journal of Volcanology and Geothermal Research*, 148(3-4), 372-406. <https://doi.org/10.1016/j.jvolgeores.2005.05.005>, 2005.
- 100 Smith, V. C., Shane, P., Nairn, I. A., and Williams, C. M.: Geochemistry and magmatic properties of eruption episodes from Haroharo linear vent zone, Okataina Volcanic Centre, New Zealand during the last 10 kyr, *Bulletin of Volcanology*, 69, 57-

88. <https://doi.org/10.1007/s00445-006-0056-7>, 2006.
- Sriaporn, C., Campbell, K. A., Van Kranendonk, M. J., and Handley, K. M.: Genomic adaptations enabling *Acidithiobacillus* distribution across wide-ranging hot spring temperatures and pHs, *Microbiome*, 9(1), 135, <https://doi.org/10.1186/s40168-021-01090-1>, 2021.
- 105 Stucker, V. K., de Ronde, C. E., Scott, B. J., Wilson, N. J., Walker, S. L., and Lupton, J. E.: Subaerial and sublacustrine hydrothermal activity at Lake Rotomahana, *Journal of Volcanology and Geothermal Research*, 314, 156-168, <https://doi.org/10.1016/j.jvolgeores.2015.06.017>, 2016.
- 110 Stucker, V. K., Curtis, J. C., and Britten, K.: Comparison of hydrothermal fluids and fields of the northern Okataina Volcanic Centre: Fifty years ago to present time, *Journal of Volcanology and Geothermal Research*, 435, 107757, <https://doi.org/10.1016/j.jvolgeores.2023.107757>, 2023.
- Tivey, M. A., de Ronde, C. E., Tontini, F. C., Walker, S. L., and Fornari, D. J.: A novel heat flux study of a geothermally active lake—Lake Rotomahana, New Zealand, *Journal of Volcanology and Geothermal Research*, 314, 95-109, <https://doi.org/10.1016/j.jvolgeores.2015.06.006>, 2016.
- 115 Villamor, P., Berryman, K. R., Nairn, I. A., Wilson, K., Litchfield, N., and Ries, W.: Associations between volcanic eruptions from Okataina volcanic center and surface rupture of nearby active faults, Taupo rift, New Zealand: Insights into the nature of volcano-tectonic interactions, *Bulletin*, 123(7-8), 1383-1405, <https://doi.org/10.1130/B30184.1>, 2011.
- Villamor, P., Litchfield, N. J., Gómez-Ortiz, D., Martin-González, F., Alloway, B. V., Berryman, K. R., Clark, K. J., Ries, W. F., Howell, A., and Ansell, I. A.: Fault ruptures triggered by large rhyolitic eruptions at the boundary between tectonic and magmatic rift segments: The Manawahe Fault, Taupō Rift, New Zealand, *Journal of Volcanology and Geothermal Research*, 427, 107478, <https://doi.org/10.1016/j.jvolgeores.2022.107478>, 2022.
- 120 Walker, S. L., de Ronde, C. E., Fornari, D., Tivey, M. A., and Stucker, V. K.: High-resolution water column survey to identify active sublacustrine hydrothermal discharge zones within Lake Rotomahana, North Island, New Zealand, *Journal of Volcanology and Geothermal Research*, 314, 142-155, <https://doi.org/10.1016/j.jvolgeores.2015.07.037>, 2016.
- 125 Ward, L., Taylor, M. W., Power, J. F., Scott, B. J., McDonald, I. R., and Stott, M.B.: Microbial community dynamics in Inferno Crater Lake, a thermally fluctuating geothermal spring, *The ISME Journal*, 11(5), 1158-1167, <https://doi.org/10.1038/ismej.2016.193>, 2017.
- White, P. A. and Leonard, G. S.: Evolution of geology and groundwater-geothermal systems in the Okataina caldera groundwater catchment, *Journal of Volcanology and Geothermal Research*, 441, 107854, <https://doi.org/10.1016/j.jvolgeores.2023.107854>, 2023.
- 130 Yang, T. H. J., Chambefort, I., Mazot, A., Rowe, M. C., Scott, B., Macdonald, N., Werner, C., Fischer, T. P., and de Ronde, C. E.: Understanding caldera degassing from a detailed investigation at Lake Rotoiti, Okataina Volcanic Centre, New Zealand, *Journal of Volcanology and Geothermal Research*, 433, 107716, <https://doi.org/10.1016/j.jvolgeores.2022.107716>, 2023.
- 135
